# Supplementary material for: Genome-Wide Screening and Stability Verification of the Robust Internal Control Genes for RT-qPCR in Filamentous Fungi
Source: MDPI journal article supplement (doi:10.3390/jof8090952), 2022-09-10
Supplement: s1 [file s1]

# **Supplementary materials:**

## **Genome-Wide Screening and Stability Verification of the Robust Internal Control Genes for RT-qPCR in Filamentous Fungi**

**Yayong Yang<sup>1,2,†</sup>, Xinyu Xu<sup>1,2,†</sup>, Zhuohan Jing<sup>1,2</sup>, Jun Ye<sup>1,2</sup>, Hui Li<sup>3</sup>, Xiaoyu Li<sup>1,2</sup>, Lei Shi<sup>1,2</sup>,  
Mengyu Chen<sup>1,2</sup>, Tengyun Wang<sup>1,2</sup>, Baogui Xie<sup>2</sup>, Yongxin Tao<sup>1,2,\*</sup>**

<sup>1</sup> College of Horticulture, Fujian Agriculture and Forestry University, Fuzhou 350002, China

<sup>2</sup> Mycological Research Center, College of Life Sciences, Fujian Agriculture and Forestry University, Fuzhou 350002, China

<sup>3</sup> Institute of Cash Crops, Hebei Academy of Agriculture and Forestry Sciences, Shijiazhuang 050051, China

\* Correspondence: taoyongxinmuse@163.com; Tel.: +86-0591-83789281

† These authors contributed equally to this work.

**Table S1.** The 10 samples of *Flammulina filiformis* and 8 samples of *Neurospora crassa* involved in this study

| NO. | Materials                     | Abbreviation | Notes                   |
|-----|-------------------------------|--------------|-------------------------|
| 1   | Mycelia                       | MY           | Heterokaryon            |
| 2   | Aerial hyphal knot            | AHK          | Heterokaryon            |
| 3   | Primordia                     | PR           | Fruiting body of strain |
| 4   | Bud                           | BUD          | Fruiting body of strain |
| 5   | Pileus in young fruiting body | YFP          | Fruiting body of strain |
| 6   | Stipe in young fruiting body  | YFS          | Fruiting body of strain |
| 7   | Pileus in elongation stage    | ELP          | Fruiting body of strain |
| 8   | Stipe in elongation stage     | ELS          | Fruiting body of strain |
| 9   | Pileus in maturation stage    | MAP          | Fruiting body of strain |
| 10  | Stipe in maturation stage     | MAS          | Fruiting body of strain |

  

| NO. | Abbreviation                  | Treatment condition                                                                                                           |
|-----|-------------------------------|-------------------------------------------------------------------------------------------------------------------------------|
| 11  | WT                            | The temperature of 25°C                                                                                                       |
| 12  | ΔSpds                         | The temperature of 25°C                                                                                                       |
| 13  | BT                            | The temperature of 25°C, the blue light treatment for 3 d, and the light intensity of 3 μmol·m <sup>-2</sup> ·s <sup>-1</sup> |
| 14  | BS                            | The temperature of 25°C, the blue light stress for 3 h, and the light intensity of 3 μmol·m <sup>-2</sup> ·s <sup>-1</sup>    |
| 15  | CS                            | Cold stress 4 °C, cultured for 30 min                                                                                         |
| 16  | HS                            | Heat stress 42 °C, cultured for 30 min                                                                                        |
| 17  | JA                            | The concentration of 0.01 mmol/L                                                                                              |
| 18  | H <sub>2</sub> O <sub>2</sub> | The concentration of 5 mmol/L                                                                                                 |

  

The two different combinations of sample sets:

|   |                              |                                              |
|---|------------------------------|----------------------------------------------|
| A | <i>F. filiformis</i> samples | Samples of 1, 2, 3, 4, 5, 6, 7, 8, 9 and 10  |
| B | <i>N. crassa</i> samples     | Samples of 11, 12, 13, 14, 15, 16, 17 and 18 |

**Table S2.** The corresponding accession number of 12 ICGs *F. filiformis* and *N. crassa*

| Gene symbol     | Gene name                                                | Accession number in<br>Ff-L11 | Accession number in<br>Nc-OR74A |
|-----------------|----------------------------------------------------------|-------------------------------|---------------------------------|
| <i>ACTB</i>     | $\beta$ -actin                                           | OP354401                      | NCU04173                        |
| <i>beta-TUB</i> | $\beta$ -tubulin                                         | OP354402                      | NCU04054                        |
| <i>GAPDH</i>    | Glyceraldehyde 3-phosphate<br>dehydrogenase              | OP354403                      | NCU01528                        |
| <i>SPRYp</i>    | SPRY-domain-containing protein                           | OP354404                      | NCU03678                        |
| <i>Ras</i>      | Ras-2 protein                                            | OP354405                      | NCU03616                        |
| <i>Vps26</i>    | Vacuolar protein sorting protein 26                      | OP354406                      | NCU02743                        |
| <i>Cwf15</i>    | Pre-mRNA-splicing factor cwc15                           | OP354407                      | NCU00335                        |
| <i>DnaJ</i>     | ER associated DnaJ chaperone                             | OP354408                      | NCU03335                        |
| <i>HUL4</i>     | E3 ubiquitin-protein ligase NEDD4                        | OP354409                      | NCU03947                        |
| <i>VAMP</i>     | ATP-binding cassette, subfamily B<br>(MDR/TAP), member 1 | OP354410                      | NCU08956                        |
| <i>RNB</i>      | Exosome complex<br>exonucleaseDIS3/RRP44                 | OP354411                      | NCU01197                        |
| <i>V-ATP</i>    | V-type H <sup>+</sup> -transporting ATPase<br>subunit A  | OP354412                      | NCU01207                        |

**Table S3.** Descriptions of 12 ICGs candidates and the primers used in *F. filiformis*

| Gene symbol                   | Gene name                                             | Primer             | Sequences (5'-3')                                     | Product size (bp) | Annealing temperature (°C) |
|-------------------------------|-------------------------------------------------------|--------------------|-------------------------------------------------------|-------------------|----------------------------|
| <i>ACTB</i>                   | $\beta$ -actin                                        | F5510QF<br>F5510QR | GATCGTATGCAGAAGGAGTTGACAC<br>CCACTCTCGTCGTACTCTTGCTTG | 211               | 62                         |
| <i><math>\beta</math>-TUB</i> | $\beta$ -tubulin                                      | F346QF<br>F346QR   | CAAATGCAGAACGTCCAGAAC<br>GTGAACTCCATCTCGTCCATAC       | 242               | 62                         |
| <i>GAPDH</i>                  | Glyceraldehyde 3-phosphate dehydrogenase              | F5082QF<br>F5082QR | GTTTCCGTTGTTGACCTTGTGTGCC<br>CGAAGTTGCCGTTGAGCTGGATAC | 118               | 62                         |
| <i>SPRYp</i>                  | SPRY-domain-containing protein                        | F5226QF<br>F5226QR | CACAGTAATATCTCCAGACGCGATC<br>TCCTACCACTCCTTCGCCTGTTG  | 237               | 62                         |
| <i>Ras</i>                    | Ras-2 protein                                         | F5609QF<br>F5609QR | TCAATGCGACGAGTAAAGAGAGG<br>CATAGGTCCCACATCTACATTTCTG  | 233               | 62                         |
| <i>Vps26</i>                  | Vacuolar protein sorting protein 26                   | F898QF<br>F898QR   | CGAGGCGAAACTATCCCAATAC<br>TATCGTCTGTTCTCCTCGTCTAC     | 134               | 62.5                       |
| <i>Cwf15</i>                  | Pre-mRNA-splicing factor cwc15                        | F7920QF<br>F7920QR | CTGAAAGAGCTGGAGAAGATCAA<br>CAGCGTCTCTTTACGGAGAAA      | 206               | 62                         |
| <i>DnaJ</i>                   | ER associated DnaJ chaperone                          | F2761QF<br>F2761QR | CTCATCCTCTTTGCCCTTTCA<br>CTGTCGGGTTGACGAAGTATT        | 157               | 62                         |
| <i>HUL4</i>                   | E3 ubiquitin-protein ligase NEDD4                     | F6860QF<br>F6860QR | CCGAGGAGAACAAGAAGGAATAC<br>ACTTGGTCCAATCGTCCATATC     | 198               | 62                         |
| <i>VAMP</i>                   | ATP-binding cassette, subfamily B (MDR/TAP), member 1 | F7311QF<br>F7311QR | GAGAAGATCAAAGAGGCTGAGG<br>GAAGAGGTAGGTCTGTGATGAATAC   | 246               | 62                         |
| <i>RNB</i>                    | Exosome complex exonuclease DIS3/RRP44                | F2240QF<br>F2240QR | TTGTTCTCTGTGTTCTCATCTC<br>GACATCCTTCGTGGACCAATAG      | 216               | 62                         |
| <i>V-ATP</i>                  | V-type H <sup>+</sup> -transporting ATPase subunit A  | F5791QF<br>F5791QR | GCAGAAATGGTATGAGCGAGTAT<br>TCTGGGACAGCTTGAACATAAG     | 173               | 62                         |

**Table S4.** Descriptions of 12 ICGs candidates and the primers used in *N. crassa*

| Gene symbol          | Gene name                                             | Primer                   | Sequences (5'–3')                                  | Product size (bp) | Annealing temperature (°C) |
|----------------------|-------------------------------------------------------|--------------------------|----------------------------------------------------|-------------------|----------------------------|
| <i>ACTB</i>          | $\beta$ -actin                                        | NCU04173QF<br>NCU04173QR | CTCCATCATGAAGTGCGATGT<br>TTCATGGAAGAAGGAGCAAGAG    | 138               | 56                         |
| $\beta$ - <i>TUB</i> | $\beta$ -tubulin                                      | NCU04054QF<br>NCU04054QR | GTCTCCATGAAGGAGGTTGAG<br>GAAGGTGGAGGACATCTTGAG     | 141               | 58                         |
| <i>GAPDH</i>         | Glyceraldehyde 3-phosphate dehydrogenase              | NCU01528QF<br>NCU01528QR | GGTTGTCTCTCCGACATGAA<br>GCATCGACCTTGGAGATGTAG      | 168               | 57                         |
| <i>SPRYp</i>         | SPRY-domain-containing protein                        | NCU03678QF<br>NCU03678QR | TTCGAGCAAGGCAGTATTC<br>TGATCGTGTGCGGTTATGAG        | 151               | 55                         |
| <i>Ras</i>           | Ras-2 protein                                         | NCU03616QF<br>NCU03616QR | CCTGTGCCGATTATGCTAGTG<br>TCAACATTTGTGCGTGTCTTTG    | 140               | 56                         |
| <i>Vps26</i>         | Vacuolar protein sorting protein 26                   | NCU02743QF<br>NCU02743QR | CCGCATCTACTTCTTGCTTGTA<br>GGAATGGTCTCTCCTCTTGATG   | 162               | 57                         |
| <i>Cwf15</i>         | Pre-mRNA-splicing factor cwc15                        | NCU00335QF<br>NCU00335QR | AGACTCCTCCGATTCTGATTCC<br>CTTCTCGCGCTGTTCTTCTTC    | 157               | 58                         |
| <i>DnaJ</i>          | ER associated DnaJ chaperone                          | NCU03335QF<br>NCU03335QR | CAAACGACGTCAGGCATTATTC<br>GGCCAACCTTCTCTTGATCTGTA  | 170               | 56                         |
| <i>HUL4</i>          | E3 ubiquitin-protein ligase NEDD4                     | NCU03947QF<br>NCU03947QR | GGTAGTGATGGTCCTCGTAGA<br>CATAGTCTCCTCCACAGCAATC    | 156               | 58                         |
| <i>VAMP</i>          | ATP-binding cassette, subfamily B (MDR/TAP), member 1 | NCU08956QF<br>NCU08956QR | CCATCGCATCTCTCCAGAAC<br>GAAGATATAGGCCAGCAGGAAG     | 203               | 58                         |
| <i>RNB</i>           | Exosome complex exonuclease DIS3/RRP44                | NCU01197QF<br>NCU01197QR | CTCTGACATCAGAAAGGGTATGG<br>GGGTACGTGAAATGAGTGTAGAG | 141               | 58                         |
| <i>V-ATP</i>         | V-type H <sup>+</sup> -transporting ATPase subunit A  | NCU01207QF<br>NCU01207QR | GATTTCTCTGATCCCGTCACTTC<br>GGTACTCCCTCTCATACCACTT  | 163               | 58                         |

**Table S5.** Raw Ct values of *ACTB* and  *$\beta$ -TUB* genes of *N. crassa* in WT strains on LC96 and CFX96 instruments

| Gene               | <i>ACTB</i> |             | <i><math>\beta</math>-TUB</i> |             |
|--------------------|-------------|-------------|-------------------------------|-------------|
| Instrument         | LC96        | CFX96       | LC96                          | CFX96       |
| Raw Ct value       | 27.25       | 27.18       | 22.51                         | 24.55       |
|                    | 27.13       | 27.93       | 22.13                         | 23.77       |
|                    | 27.06       | 27.12       | 21.94                         | 24.05       |
|                    | 28.59       | 28.60       | 23.86                         | 22.99       |
|                    | 27.94       | 28.69       | 23.66                         | 23.32       |
|                    | 27.87       | 28.59       | 23.18                         | 22.79       |
|                    | 28.01       | 28.98       | 21.98                         | 22.42       |
|                    | 28.16       | 29.05       | 21.76                         | 23.15       |
|                    | 28.22       | 29.04       | 22.44                         | 22.68       |
| Mean Ct            | 27.80333333 | 28.35333333 | 22.60666667                   | 23.30222222 |
| Standard deviation | 0.505261209 | 0.719320667 | 0.732378166                   | 0.656908209 |
| P value            | 0.0958      |             | 0.0628                        |             |

Notice: LC96: LightCycler® 96 Instrument; CFX96: Bio–Rad CFX96 Real-Time PCR Detection System. *P* values were derived from unpaired t tests.

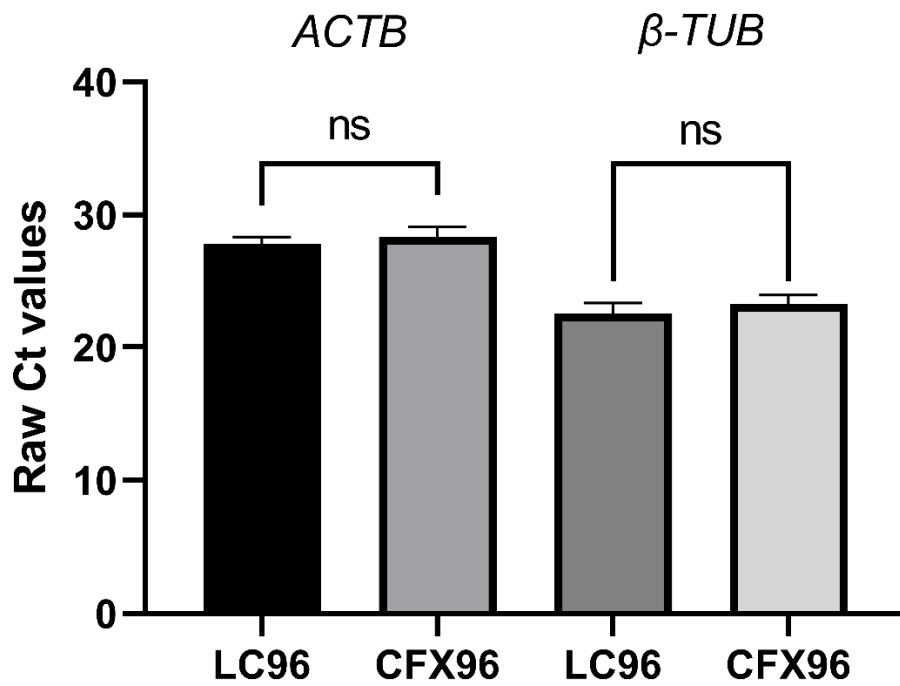

**Figure S1.** Raw Ct values bar graph of *ACTB* and *β-TUB* genes of *N. crassa* in WT strains on LC96 and CFX96 instruments, respectively. Average Ct value of three biological replicates and three technical replicates were shown on the Y-axis. The two different instruments LC96 (LightCycler® 96 Instrument) and CFX96 (Bio-Rad CFX96 Real-Time PCR Detection System) were shown on the X-axis. The values are the means  $\pm$  SD of three independent experiments. (Student's t test: ns: no significant).
